## 30 **Abstract**

31 In the process of synaptic formation, neurons must not only adhere to specific principles  
32 when selecting synaptic partners but also possess mechanisms to avoid undesirable  
33 connections. Yet, the strategies employed to prevent unwarranted associations have  
34 remained largely unknown. In our study, we have identified the pivotal role of  
35 combinatorial clustered protocadherin gamma ( $\gamma$ -PCDH) expression in orchestrating  
36 synaptic connectivity in the mouse neocortex. Through 5-prime end single-cell  
37 sequencing, we unveiled the intricate combinatorial expression patterns of  $\gamma$ -PCDH  
38 variable isoforms within neocortical neurons. Furthermore, our whole-cell patch-clamp  
39 recordings demonstrated that as the similarity in this combinatorial pattern among  
40 neurons increased, their synaptic connectivity decreased. Our findings elucidate a  
41 sophisticated molecular mechanism governing the construction of neural networks in  
42 the mouse neocortex.

43

## 44 **Introduction**

45 The precision of synaptic connections is vital for the functioning of neural  
46 circuits(Yogev and Shen, 2014). Cell adhesion molecules play crucial roles in the  
47 specificity of synapse formation(Duan et al., 2014, Serizawa et al., 2006, Tan et al.,  
48 2015, Rawson et al., 2017, Sytnyk et al., 2017, Berns et al., 2018, Jang et al., 2017,  
49 Courgeon and Desplan, 2019). However, how to achieve such specificity at the  
50 microcircuit level remains an open question. The unique expression pattern of clustered  
51 protocadherins (cPCDH) leads to millions of possible combinations of cPCDH  
52 isoforms on the neuron surface(Kaneko et al., 2006, Esumi et al., 2005), effectively  
53 serving as a distinctive barcode for each neuron(Yagi, 2012). Notably, the absence of  
54  $\gamma$ -PCDH does not induce general abnormalities in the development of the cerebral  
55 cortex, including cell differentiation, migration, and survival(Wang et al., 2002, Garrett  
56 et al., 2012). However,  $\gamma$ -PCDH presence has been detected at synaptic  
57 contacts(Fernandez-Monreal et al., 2009, Phillips et al., 2003, LaMassa et al., 2021),  
58 and its absence has substantial effects on neuronal connectivity(Tarusawa et al., 2016,  
59 Kostadinov and Sanes, 2015, Lv et al., 2022). While the homophilic properties of  $\gamma$ -

60 PCDH promote dendritic complexity(Molumby et al., 2016), emerging evidence  
61 suggests that it might hinder synapse formation. Previous studies indicate that  
62 homophilic interactions, facilitated by large overlapping patterns of cPCDH isoforms  
63 on opposing cell surfaces, may lead to intercellular repulsion(Rubinstein et al., 2015,  
64 Brasch et al., 2019, Honig and Shapiro, 2020, Lefebvre et al., 2012). Consistent with  
65 the repulsion concept, the absence of  $\gamma$ -PCDH results in significantly more dendritic  
66 spines and inhibitory synapse densities in neocortical neurons(Molumby et al., 2017,  
67 Steffen et al., 2021). Paralleling this, neurons overexpressing one of the  $\gamma$ -PCDH  
68 isoforms exhibit significantly fewer dendritic spines(Molumby et al., 2017).  
69 Furthermore, the absence of the clustered PCDH augments local reciprocal neural  
70 connection between lineage-related neurons in the neocortex(Tarusawa et al., 2016, Lv  
71 et al., 2022), even when sister cells exhibit more similar expression patterns of  $\gamma$ -PCDH  
72 isoforms(Lv et al., 2022).

73 Intriguingly, while  $\gamma$ -PCDH appears to have "contradictory" effects on dendritic  
74 complexity and dendritic spines, it negatively influences synapse formation in the  
75 forebrain. It's important to note that each neuron expresses multiple isoforms of  $\gamma$ -  
76 PCDH(Kaneko et al., 2006, Lv et al., 2022). What is the impact of this combinatorial  
77 expression on synapse formation? In this study, using 5-prime end (5'-end) single-cell  
78 sequencing, we revealed the diversified combinatorial expression of  $\gamma$ -PCDH isoforms  
79 in neocortical neurons. Through multiple whole-cell patch-clamp recordings after the  
80 sequential *in utero* electroporation, we discovered that the combinatorial expression of  
81  $\gamma$ -PCDHs empowers neurons to decide which partners to refrain from forming synapses  
82 with, rather than merely determining which ones to engage in synaptogenesis with.

83

## 84 **Results**

### 85 **The diversified combinatorial expression pattern of $\gamma$ -PCDHs in neocortical** 86 **neurons revealed by 5'-end single-cell sequencing**

87 The gamma isoform of cPCDHs ( $\gamma$ -PCDHs) is critical for synaptic  
88 connectivity(Kostadinov and Sanes, 2015, Tarusawa et al., 2016, Lv et al., 2022). To  
89 determine the role of  $\gamma$ -PCDH in the neocortex, we examined their expression in the

90 neocortical neurons of postnatal mice. Existing research has suggested that clustered  
91 protocadherins are expressed stochastically in Purkinje cells and olfactory sensory  
92 neurons(Hirayama et al., 2012, Toyoda et al., 2014, Mountoufaris et al., 2017). In this  
93 study, we harnessed the power of 5'-end single-cell RNA sequencing to precisely  
94 identify  $\gamma$ -PCDH isoforms by focusing on their variable exon, exon 1, where they differ  
95 from each other(Kohmura et al., 1998, Wu and Maniatis, 1999). Given that the second  
96 postnatal week is the critical stage for synapse formation in the rodent  
97 neocortex(Lendvai et al., 2000, Holtmaat and Svoboda, 2009), we chose postnatal day  
98 11 (P11) as the time point for our examination. Following reverse transcription and  
99 cDNA amplification (Fig. 1-S1A, B), we divided the cDNA into two segments: one  
100 designed for the specific amplification of *Pcdhg* mRNAs and the other for the  
101 construction of a 5' gene expression library (Fig. 1-S1C). After the cluster analysis (Fig.  
102 1-S2-4), we collected 6505 neurons from an initial pool of 17438 cells (Fig. 1A and Fig.  
103 1-S1D). For in-depth analysis, we focused on neurons expressing more than 10 unique  
104 molecular identifiers (UMI) for all  $\gamma$ -PCDH isoforms (cutoff >1 for each type of  
105 individual isoform) (Fig. 1B, C). We observed the near-ubiquitous expression of "C-  
106 type" isoforms, specifically C3, C4, and C5 (Fig. 1D). It's important to note that the  
107 fraction of cells expressing "C-type" isoforms was significantly higher when compared  
108 to "variable" isoforms (Fig. 1D and Fig. 1-S1E), which is consistent with findings from  
109 a previous study(Toyoda et al., 2014).

110 We proceeded to conduct a pairwise analysis to assess the similarity of "variable"  
111 isoforms among neurons regarding the single-cell expression pattern of  $\gamma$ -PCDHs. This  
112 extensive analysis revealed that the majority of neocortical neurons from all clusters  
113 exhibited very low similarity level (Fig. 1E, Fig. 1-S5 and 1-S6). This finding strongly  
114 suggests distinct combinatorial expression patterns among these neurons. Given that all  
115 our electrophysiological recordings were carried out on pyramidal neurons in the layer  
116 2/3 of the neocortex, we conducted more detailed analysis, including the examination  
117 of detailed expression of  $\gamma$ -PCDHs in individual neurons, specifically in the  
118 corresponding cluster 7. All these analyses consistently revealed a diverse range of  
119 combinatorial expression patterns among neurons in this cluster, a phenomenon in

120 alignment with the general population of neocortical neurons (Fig. 1-S5).  
121 To further characterize this diversity, we employed variance analysis as per Wada et  
122 al.(Wada et al., 2018), to examine the distribution of the number of expressed isoforms  
123 per cell across all neurons (Fig. 1F and Fig. 1-S7). As per Wada's definition of 'co-  
124 occurrence' (Wada et al., 2018), this primarily indicates potential interactions among  
125 different isoform expressions at the population level. This analysis uncovered a subtle  
126 but significant co-occurrence of  $\gamma$ -PCDH isoform expression in most neurons (Fig. 1G).  
127 Notably, we did not detect any discernible differences among clusters, except for cluster  
128 0, which displayed considerably lower expression (Fig. 1C) and no co-occurrence of  $\gamma$ -  
129 PCDH isoforms (Fig. 1G and Fig. 1-S7). In summary, the data derived from 5'-end  
130 single-cell sequencing underscore the diverse and complex combinatorial expression of  
131  $\gamma$ -PCDHs within the majority of neocortical neurons.

132

### 133 **The absence of $\gamma$ -PCDHs increases local synaptic connectivity among pyramidal** 134 **neurons in the neocortex**

135 To delve into the function of  $\gamma$ -PCDH in the synaptic formation among neocortical  
136 neurons, we conducted paired recordings on pyramidal neurons in the layer 2/3 of the  
137 neocortex from *Pcdhg* conditional knockout (cKO) mice. These genetically engineered  
138 mice were created by crossing *Pcdhg*<sup>flx/flx</sup> mice(Lefebvre et al., 2008, Prasad et al.,  
139 2008) with *Nex-cre* mice(Goebbels et al., 2006). This genetic combination specifically  
140 removed all variable and C-type  $\gamma$ -PCDH isoforms in pyramidal neurons. Our  
141 experimental setup involved multiple whole-cell patch-clamp recordings from cortical  
142 slices harvested from P9-32 mice, allowing us to measure the connectivity among  
143 nearby pyramidal cells (<200  $\mu$ m between cell somas) in the layer 2/3 of the neocortex  
144 by assessing the presence of evoked monosynaptic responses (Fig. 2 and Fig. 2-S1).  
145 In the sample traces featured in the connectivity matrix obtained from six recorded  
146 neurons (Fig. 2A and Fig. 2-S1), we observed two neuronal pairs (neuronal pairs 4→3  
147 and 5→6) exhibiting unidirectional monosynaptic connections (indicated by orange  
148 arrows), and one pair (neuronal pair 1↔3) displaying bidirectional connections  
149 (indicated by green arrows) out of 15 possible pairings. Overall, our analysis revealed

150 that the percentage of connected pairs was notably higher in *Pcdhg* cKO mice (20.2%,  
151 103/511) than in wild-type (WT) mice (15.0%, 122/813) (Fig. 2B). In light of the  
152 distinct roles that vertical vs. horizontal axes might play in synaptic organization within  
153 the neocortex (Douglas and Martin, 2004), we conducted an additional set of recordings  
154 on P10-20 mice, segregating neuron pairs along these axes. In *Pcdhg* cKO mice, we  
155 observed a more significant difference in connectivity for vertically aligned cells  
156 (18.3%, 94/515 in *Pcdhg* cKO mice vs. 11.2%, 73/651 in WT mice for vertically  
157 aligned neuron pairs; 12.2%, 27/221 in *Pcdhg* cKO mice vs. 9.5%, 28/294 in WT mice  
158 for horizontally aligned neuron pairs) (Fig. 2C). We also created *Pcdha* cKO mice (Fig.  
159 2-S2-4) and carried out similar experiments focused on vertically aligned neurons. In  
160 these mice lacking  $\alpha$ -PCDH, we didn't observe a significant difference (11.3%, 38/337  
161 in *Pcdha* cKO mice vs. 14.3%, 26/182 in WT mice, Fig. 2D).

162 A more detailed analysis of synaptic connections among vertically aligned neurons in  
163 *Pcdhg* cKO mice unveiled that the absence of  $\gamma$ -PCDH expression significantly  
164 increased synapse formation between cells separated vertically by 50 to 100  $\mu\text{m}$  (24.0%,  
165 50/208 in *Pcdhg* cKO mice vs. 9.6%, 20/208 in WT mice) (Fig. 2E). Notably, this  
166 increased synapse formation was detected starting from P10 (16.1%, 32/199 in *Pcdhg*  
167 cKO mice vs. 8.7%, 20/230 in WT mice for P10-12; 21.6%, 22/102 in *Pcdhg* cKO mice  
168 vs. 12.8%, 29/227 in WT mice for P13-15). These time points correspond to the period  
169 when chemical synapses between cortical neurons become detectable, and this trend  
170 persisted throughout our measurements, spanning up to P20 (Fig. 2F). Hence, our  
171 findings suggest that  $\gamma$ -PCDHs may play a role in preventing synapse formation from  
172 the early stages of neural development.

173

#### 174 **Overexpression of $\gamma$ -PCDHs decreases local synaptic connectivity in the mouse** 175 **neocortex**

176 To further determine the influence of  $\gamma$ -PCDHs on synaptic connectivity, we  
177 overexpressed randomly selected single or multiple  $\gamma$ -PCDH isoforms tagged with  
178 fluorescent proteins through *in utero* electroporation in mice. Subsequently, we  
179 performed a series of multiple whole-cell patch-clamp recordings to unveil how  $\gamma$ -

180 PCDHs affect synaptic connectivity between neurons situated in the layer 2/3 of the  
181 neocortex.

182 Firstly, to validate the overexpression effect, we conducted a battery of assays,  
183 including Real-Time Quantitative Reverse Transcription PCR (qRT-PCR) (Fig. 3A, B),  
184 single-cell RT-PCR (Fig. 3C, D), and immunohistochemistry (Fig. 3-S1A to C). The  
185 qRT-PCR assays unequivocally confirmed that the electroporated isoforms, as opposed  
186 to the non-overexpressed ones from the contralateral side, exhibited significantly higher  
187 expression levels (Fig. 3A, B). To assess how many isoforms were typically expressed  
188 in a given neuron when multiple plasmids were electroporated, we strategically tagged  
189 the first five isoforms with mNeogreen and the sixth with mCherry (Fig. 3-S1A).  
190 Employing a probability analysis based on the occurrence of yellow and red-only cells  
191 within the total electroporated neuron population (Fig. 3-S1B), we ascertained that each  
192 positive neuron expressed an average of 5.6 types of isoforms (Fig. 3-S1C and the top  
193 panel of D). This result harmonized with data obtained from single-cell RT-PCR  
194 analysis, wherein an average of 5.3 types out of the six electroporated isoforms was  
195 detected from 19 neurons (Fig. 3C, D and the bottom panel of Fig. 3-S1D). These  
196 single-cell RT-PCR findings further substantiate that the electroporation-introduced  
197 isoforms predominate within these neurons (Fig. 3D).

198 Since the distribution of neocortical neurons across different layers significantly  
199 influences their synaptic connections(He et al., 2015), we meticulously examined the  
200 positions of these neurons relative to the pial surface after overexpression. Remarkably,  
201 we observed that overexpressing  $\gamma$ -PCDH isoforms did not induce any alterations in  
202 cell positioning within the neocortex compared to the control plasmids (Fig. 3-S1E, F).  
203 Subsequently, through multiple recordings, we embarked on a quest to assess the  
204 impact of  $\gamma$ -PCDHs on synapse formation. Intriguingly, overexpressing one or six  $\gamma$ -  
205 PCDH variable isoforms in neurons significantly diminished the rate of synaptic  
206 connections among them (10.3%, 15/146 in expressing control plasmids; 1.9%, 4/216  
207 in overexpressing one isoform; and 4.4%, 8/181 in overexpressing six isoforms, red  
208 bars in Fig. 3E). However, when overexpressing  $\gamma$ -PCDH C4, we did not observe any  
209 significant effect on the synaptic connection rate (11.3%, 12/106 in neurons



210 overexpressing  $\gamma$ -PCDH C4, Fig. 3E).

211 To further exclude the potential influence of C-type  $\gamma$ -PCDHs in synapse formation, we  
212 employed a similar strategy in *Pcdhg* cKO mice, electroporating six variable isoforms.  
213 Remarkably, this overexpression also led to a reduction in the connection rate in *Pcdhg*  
214 cKO mice (6.1%, 12/198 in overexpressing six isoforms vs. 16.5%, 31/188 in  
215 expressing control plasmids), mirroring the outcome observed in WT littermate mice  
216 (6.6%, 8/121 in overexpressing six isoforms vs. 16.5%, 18/109 in expressing control  
217 plasmids) (Fig. 3F). These compelling observations collectively underscore that  
218 overexpressing the variable isoforms, as opposed to the C-type isoform C4, leads to a  
219 decrease in synaptic connectivity within the mouse neocortex.

220

## 221 **Combinatorial expression of $\gamma$ -PCDHs regulates synaptic connectivity in the** 222 **mouse neocortex**

223 Our quest to understand the influence of combinatorial expression patterns of  $\gamma$ -PCDH  
224 isoforms on synapse formation led us to conduct a sequential *in utero* electroporation  
225 at E14.5 and E15.5 (Fig. 4A). In this intricate procedure, our objective was to  
226 deliberately manipulate the degree of similarity in expression between two distinct  
227 groups of neurons. To achieve this, we randomly selected isoforms, although with the  
228 notable exception of isoforms A5 and B8. These two isoforms were singled out due to  
229 their low expression levels as indicated by the single-cell sequencing data (Fig. 1D and  
230 Fig. 1-S1E). The various isoforms were thoughtfully combined to create similarity  
231 levels spanning from 0% (indicating no overlap, complete dissimilarity between the  
232 two groups) to 100% (representing complete overlap, indicating that the two groups are  
233 entirely identical) (Fig. 4B).

234 For the purpose of electroporation at E14.5 and E15.5, we employed fluorescent  
235 proteins mNeongreen and mRuby3 (Bajar et al., 2016) to tag isoforms, which allowed  
236 us to distinguish the cells electroporated on these respective days (Fig. 4A).  
237 Subsequently, whole-cell patch-clamp recordings were performed on layer 2/3 neurons  
238 in the neocortex using acute brain slices containing both green and red cells from P10-  
239 14 pups. Each set of recordings encompassed at least one mNeongreen<sup>+</sup>, one mRuby3<sup>+</sup>,



240 and one nearby control neuron without fluorescence (Fig. 4C). The results were very  
241 clear: neurons sharing the same color displayed significantly lower connectivity (Fig.  
242 4-S1A), aligning with our previous findings from single electroporation (as shown in  
243 Fig. 3E). In the group characterized by a 100% similarity level, the connectivity rate  
244 between neurons with different colors that were electroporated on different days was  
245 also significantly lower compared to the control (3.7%, 5/134 in the complete-overlap  
246 group; 12.5%, 19/151 in control pairs, 100% in Fig. 4D). However, as the similarity  
247 levels descended from 100% to 0%, the connectivity probabilities progressively  
248 reverted to the control level. The likelihood rebounded to 8.4% (14/165) for the pairs  
249 with a 33% similarity level and 10.3% (12/117) and 10.5% (12/114) for pairs with 11%  
250 or 0% similarity level, respectively (Fig. 4D). This compelling observation illuminated  
251 a fundamental principle: it is the similarity level of  $\gamma$ -PCDH isoforms shared between  
252 neurons, rather than the absolute expression of the protein within individual neurons,  
253 that dictates the regulation of synaptic formation.

254 Remarkably, in line with the single-electroporation experiment (gray bars in Fig. 3E),  
255 no significant changes were observed in the synaptic connectivity between  
256 electroporated neurons and nearby control neurons (Fig. 4-S1B). In summation, our  
257 findings illuminate a discernible negative correlation between the probability of  
258 synaptic connections and the similarity level of  $\gamma$ -PCDH isoforms expressed in neuron  
259 pairs (Fig. 4E). These discoveries underline the significance of the diversified  
260 combinatorial expression of  $\gamma$ -PCDH isoforms in regulating synapse formation between  
261 adjacent pyramidal cells. Simply put, the more similar the patterns of  $\gamma$ -PCDH isoforms  
262 expressed in neurons, the lower the probability of synapse formation between them (Fig.  
263 4F).

264

## 265 **Discussion**

266 Homophilic proteins cPCDHs are strong candidates for promoting synaptic specificity  
267 due to their combinatorial and stochastic expression pattern (Yagi, 2012, Kohmura et  
268 al., 1998, Toyoda et al., 2014). Our 5'-end single-cell sequencing data provided solid  
269 evidence for the combinatorial expression pattern of  $\gamma$ -PCDH isoforms in neocortical

270 neurons. We further demonstrated the critical role of this diversity in synaptic  
271 connectivity through three lines of evidence. Firstly, the absence of  $\gamma$ -PCDH  
272 significantly increased functional connectivity between adjacent neocortical neurons.  
273 Secondly, electroporation-induced overexpression of identical  $\gamma$ -PCDH variable  
274 isoforms in developing neurons markedly decreased their connectivity. Lastly, using  
275 sequential *in utero* electroporation with different batches of isoforms, we found that  
276 increasing the similarity level of  $\gamma$ -PCDH variable isoforms expressed in neurons led  
277 to a reduction in their synaptic connectivity. These findings suggest that  $\gamma$ -PCDHs  
278 regulate the specificity of synapse formation by preventing synapse formation with  
279 specific cells, rather than by selectively choosing particular targets. It remains to be  
280 studied whether the diversified patterns of  $\gamma$ -PCDH isoforms expressed in different  
281 neurons have additional coding functions for neurons beyond their homophilic  
282 interaction.

283 Stochastic and combinatorial expression patterns of cPCDH have been identified in  
284 Purkinje cells(Esumi et al., 2005, Toyoda et al., 2014) and olfactory sensory  
285 neurons(Mountoufaris et al., 2017). However, it's noteworthy that in serotonergic  
286 neurons, only one isoform, *Pcdhac2*, has been mainly detected(Chen et al., 2017). In  
287 our study, utilizing 5'-end single-cell sequencing, we have unveiled the stochastic and  
288 combinatorial expression patterns of variable  $\gamma$ -PCDH isoforms in neocortical neurons.  
289 These diverse observations across different cell types suggest that cPCDH diversity and  
290 the presence of ubiquitous C-type expression are not universal features throughout the  
291 brain(Kiefer et al., 2023). These distinct expression patterns of cPCDHs imply that this  
292 gene cluster might exert different roles in shaping neural connections in various brain  
293 regions. Furthermore, compared to the SMART seq results from the Allen Institute's  
294 database and others(Lv et al., 2022) focusing on  $\gamma$ -PCDH, 5'-end single-cell sequencing  
295 used in our study not only detected more isoforms in individual cells but also revealed  
296 more neurons expressing C-type isoforms. The application of this approach may offer  
297 valuable insights for studying the functions of cPCDHs in a broader neurological  
298 context.

299 Previous studies by Molumby et al. demonstrated that neurons from the neocortex of  
300 *Pcdhg* knockout mice exhibited significantly more dendritic spines, while neurons  
301 overexpressing a single  $\gamma$ -PCDH isoforms had fewer dendritic spines in (Molumby et  
302 al., 2017). Our recordings are consistent with these previous morphology studies.  
303 Tarusawa et al. revealed that the absence of the whole cluster of cPCDH affected  
304 synaptic connections among lineage-related cells(Tarusawa et al., 2016). More recently,  
305 overexpression of the C-type  $\gamma$ -PCDH isoform C3 also showed a negative effect on  
306 synapse formation within a defined clone(Lv et al., 2022). In our study, we further  
307 demonstrated an increased synaptic connection rate between adjacent pyramidal  
308 neurons in the neocortex of *Pcdhg* knockout mice, while it decreased between neurons  
309 overexpressing single or multiple identical  $\gamma$ -PCDH variable isoforms. These effects  
310 were not just limited to lineage-dependent cells. Together with previous  
311 findings(Molumby et al., 2017, Tarusawa et al., 2016), our observations solidify the  
312 negative effect of  $\gamma$ -PCDHs on synapse formation among neocortical neurons. Some  
313 subtle differences exist between our findings and previous recordings(Tarusawa et al.,  
314 2016, Lv et al., 2022). Tarusawa et al. demonstrated that the connection probability  
315 between excitatory neurons lacking the entire cPCDH cluster in the layer 4 was  
316 approximately twofold higher at early stage P9-11, significantly lower at P13-16, and  
317 similar to control cells at P18-20 compared (Tarusawa et al., 2016). In our study, *Pcdhg*  
318 <sup>-/-</sup> pyramidal neuronal pairs consistently exhibited a higher connection probability from  
319 P10 to P20. Two potential reasons could explain these differences. Firstly, we only  
320 removed  $\gamma$ -PCDHs instead of the entire cPCDH cluster, which includes  $\alpha$ ,  $\beta$ , and  $\gamma$   
321 isoforms. Secondly,  $\gamma$ -PCDH might have different functions in neurons located in the  
322 layer 2/3 compared to the layer 4. Lv et al. found that overexpression of C-type  $\gamma$ -PCDH  
323 C3 decreased the preferential connection between sister cells(Lv et al., 2022). However,  
324 our study demonstrated that only variable, but not C-type isoform C4, had a negative  
325 impact on synapse formation. This discrepancy might be attributed to the lineage  
326 relationship, which could have an unknown impact on synapse formation. Building  
327 upon previous findings, it's becoming increasingly evident that distinct C-type isoforms

328 may play varied roles in shaping neural networks within the brain(Garrett et al., 2019,  
329 Steffen et al., 2023, Meltzer et al., 2023, Lv et al., 2022).

330 Since a single neuron can express multiple isoforms, deleting all  $\gamma$ -PCDH isoforms  
331 might mask the role of this combination. In this study, we manipulated the  
332 combinatorial expression patterns of  $\gamma$ -PCDH isoforms in nearby neocortical neurons  
333 through sequential *in utero* electroporation, expressing different batches of isoforms  
334 with adjustable similarities. We observed that when two neurons expressed identical  
335 variable isoforms (100% group), the likelihood of synapse formation between them was  
336 lowest. As the similarity level between two cells decreased, with fewer shared isoforms,  
337 the connectivity probability increased. The connectivity probability between neurons  
338 with different variable isoforms (0% group) did not differ from the control pairs  
339 (without overexpression). However, the connections between overexpressed and  
340 control neurons were not affected under both 100% and 0% similarity conditions. These  
341 observations suggest that the similarity level, rather than the absolute expression of the  
342 protein, affects synapse formation between neurons. While we observed a negative  
343 correlation between expression similarity and the probability of connectivity among  
344 neocortical neurons, further investigation is needed to determine the precise cellular  
345 mechanisms underpinning this correlation. It's essential to explore whether this  
346 correlation arises directly from the formation of synapses or is a secondary effect  
347 resulting from cell positioning(Lv et al., 2022), synaptic pruning(Kostadinov and Sanes,  
348 2015) or the influence of  $\gamma$ -PCDHs on the growth of axon/dendrite(Molumby et al.,  
349 2017, Molumby et al., 2016). Previous studies have established that the interplay  
350 between  $\gamma$ -PCDHs and neuroligin-1 plays a crucial role in the negative regulation of  
351 dendritic spine morphogenesis(Molumby et al., 2017). Consequently, exploring  
352 whether the similarity in the expression of  $\gamma$ -PCDHs between two neurons influences  
353 their interaction with neuroligin-1 could yield valuable insights.

354 Our findings also demonstrated that the overexpression of multiple  $\gamma$ -PCDH variable  
355 isoforms in one neuron only affected its connection if the other neuron overexpressed  
356 an identical combination of  $\gamma$ -PCDH isoforms. This highlights the pivotal role of the  
357 diversified combinatorial expression of  $\gamma$ -PCDHs of neurons in selecting their synaptic

358 partners in the mouse neocortex. Notably, while the overexpression of the  $\gamma$ -PCDH C4  
359 isoform had no discernible effect on synaptic connectivity, overexpressing six variable  
360 isoforms resulted in a reduced connection rate in *Pcdhg* cKO mice. These observations  
361 underscore the critical role of variable isoforms, as opposed to the C-type isoform C4,  
362 in synapse formation within the mouse neocortex. Although the overexpression of the  
363  $\gamma$ -PCDH C3 isoform has been shown to have a negative effect on synapse formation  
364 between sister cells, but no effect on synapses among non-clone cells in the  
365 neocortex(Lv et al., 2022), the distinct functions of individual C-type isoforms require  
366 further thorough examination. It's worth noting that our observations primarily stem  
367 from overexpression assays, providing insights into the effects of  $\gamma$ -PCDHs on synaptic  
368 connectivity. Exploring their impact under more physiological conditions using  
369 alternative approaches holds significant promise.

370 Furthermore, while the absence of  $\gamma$ -PCDHs causes significantly more synaptic  
371 formation among neocortical pyramidal neurons, evidence supports that their absence  
372 also leads to a significant reduction of synapse formation in other brain regions. For  
373 example, mice lacking  $\gamma$ -PCDHs exhibit fewer synapses in spinal cord  
374 interneurons(Weiner et al., 2005). Knocking down  $\gamma$ -PCDHs causes a decline in  
375 dendritic spines in cultured hippocampal neurons(Suo et al., 2012) and diminished  
376 astrocyte-neuron contacts in co-cultures from the developing spinal cord(Garrett and  
377 Weiner, 2009). The absence of  $\gamma$ -PCDHs leads to reduced dendritic arborization and  
378 dendritic spines in olfactory granule cells(Ledderose et al., 2013). Additionally,  
379 immuno-positive signals for  $\gamma$ -PCDHs are more frequently detected in mushroom  
380 spines than in thin spines(LaMassa et al., 2021). Moreover, our observations revealed  
381 that the absence of  $\gamma$ -PCDHs had a more pronounced impact on vertically aligned  
382 neurons than on horizontally situated pairs in the neocortex. These findings suggest that  
383 different mechanisms may be employed by synapses in different brain regions to  
384 achieve their specificity. Notably, different mechanisms have already been proposed  
385 for targeting specific inhibitory neural circuits in the neocortex, including “on-target”  
386 synapse formation for targeting apical dendrites and “off-target” synapse selective  
387 removal for somatic innervations(Gour et al., 2021).

388 In summary, our data demonstrate that the similarity level of  $\gamma$ -PCDH isoforms between  
389 neocortical neurons is critical for their synapse formation. Neurons expressing more  
390 similar  $\gamma$ -PCDH isoform patterns exhibit a lower probability of forming synapses with  
391 one another. This suggests that the presence of  $\gamma$ -PCDHs enables neocortical neurons  
392 to choose which neurons to avoid synapsing with, rather than selecting specific neurons  
393 to form synapses with. Whether there are specific attractive forces between cells to  
394 promote synaptic specificity remains an open question.

395

### 396 **Acknowledgements**

397 We thank Dr. Yifeng Zhang for providing the *Pcdhg flox/flox* mouse line and Dr. Zilong  
398 Qiu for *Nex-cre* mouse line, Dr. Jun Chu for sharing plasmids with mNeongreen and  
399 mRuby3, and other members in Xu lab for their discussions and technique supports. We  
400 are grateful to Prof. Mu-ming Poo and Song-hai Shi for critical reading of the  
401 manuscript. This work was supported by grants from the Training Program of the Major  
402 Research Plan of the National Natural Science Foundation of China, grant No.  
403 91632101; Strategic Priority Research Program of the Chinese Academy of Sciences,  
404 grant No. XDB32010100; National Natural Science Foundation of China project  
405 31671113; Shanghai Municipal Science and Technology Major Project, grant No.  
406 2018SHZDZX05, the State Key Laboratory of Neuroscience and the Lingang  
407 Laboratory, grant No. LG-GG-202201-01.

408

### 409 **Author contributions**

410 H. -T. X. conceived the project. Y. -J. Z. performed most recordings and single-cell  
411 analysis. C. -Y. D. and L. F. performed part of recordings. Y. -Q. W. prepared PCDH  
412 plasmids. H. Z. prepared mice. Y. -J. Z. and H. -T. X. wrote the manuscript.

413

### 414 **References**

415 BAJAR, B. T., WANG, E. S., LAM, A. J., KIM, B. B., JACOBS, C. L., HOWE, E. S., DAVIDSON, M. W., LIN, M.  
416 Z. & CHU, J. 2016. Improving brightness and photostability of green and red fluorescent  
417 proteins for live cell imaging and FRET reporting. *Sci Rep*, 6, 20889. doi: 10.1038/srep20889.

- 418 BERNIS, D. S., DENARDO, L. A., PEDERICK, D. T. & LUO, L. 2018. Teneurin-3 controls topographic circuit  
419 assembly in the hippocampus. *Nature*, 554, 328-333. doi: 10.1038/nature25463.
- 420 BRASCH, J., GOODMAN, K. M., NOBLE, A. J., RAPP, M., MANNEPALLI, S., BAHNA, F., DANDEY, V. P.,  
421 BEPLER, T., BERGER, B., MANIATIS, T., POTTER, C. S., CARRAGHER, B., HONIG, B. & SHAPIRO, L.  
422 2019. Visualization of clustered protocadherin neuronal self-recognition complexes. *Nature*,  
423 569, 280-283. doi: 10.1038/s41586-019-1089-3.
- 424 CHEN, W. V., NWAKEZE, C. L., DENNY, C. A., O'KEEFFE, S., RIEGER, M. A., MOUNTOUFARIS, G., KIRNER,  
425 A., DOUGHERTY, J. D., HEN, R., WU, Q. & MANIATIS, T. 2017. Pcdhalphac2 is required for  
426 axonal tiling and assembly of serotonergic circuitries in mice. *Science*, 356, 406-411. doi:  
427 10.1126/science.aal3231.
- 428 COURGEON, M. & DESPLAN, C. 2019. Coordination between stochastic and deterministic specification  
429 in the Drosophila visual system. *Science*, 366doi: 10.1126/science.aay6727.
- 430 DOUGLAS, R. J. & MARTIN, K. A. 2004. Neuronal circuits of the neocortex. *Annu Rev Neurosci*, 27, 419-  
431 51. doi: 10.1146/annurev.neuro.27.070203.144152.
- 432 DUAN, X., KRISHNASWAMY, A., DE LA HUERTA, I. & SANES, J. R. 2014. Type II cadherins guide assembly  
433 of a direction-selective retinal circuit. *Cell*, 158, 793-807. doi: 10.1016/j.cell.2014.06.047.
- 434 ESUMI, S., KAKAZU, N., TAGUCHI, Y., HIRAYAMA, T., SASAKI, A., HIRABAYASHI, T., KOIDE, T., KITSUKAWA,  
435 T., HAMADA, S. & YAGI, T. 2005. Monoallelic yet combinatorial expression of variable exons of  
436 the protocadherin-alpha gene cluster in single neurons. *Nat Genet*, 37, 171-6. doi:  
437 10.1038/ng1500.
- 438 FERNANDEZ-MONREAL, M., KANG, S. & PHILLIPS, G. R. 2009. Gamma-protocadherin homophilic  
439 interaction and intracellular trafficking is controlled by the cytoplasmic domain in neurons.  
440 *Mol Cell Neurosci*, 40, 344-53. doi: 10.1016/j.mcn.2008.12.002.
- 441 GARRETT, A. M., BOSCH, P. J., STEFFEN, D. M., FULLER, L. C., MARCUCCI, C. G., KOCH, A. A., BAIS, P.,  
442 WEINER, J. A. & BURGESS, R. W. 2019. CRISPR/Cas9 interrogation of the mouse Pcdhg gene  
443 cluster reveals a crucial isoform-specific role for Pcdhgc4. *PLoS Genet*, 15, e1008554. doi:  
444 10.1371/journal.pgen.1008554.
- 445 GARRETT, A. M., SCHREINER, D., LOBAS, M. A. & WEINER, J. A. 2012. gamma-protocadherins control  
446 cortical dendrite arborization by regulating the activity of a FAK/PKC/MARCKS signaling  
447 pathway. *Neuron*, 74, 269-76. doi: 10.1016/j.neuron.2012.01.028.
- 448 GARRETT, A. M. & WEINER, J. A. 2009. Control of CNS synapse development by {gamma}-  
449 protocadherin-mediated astrocyte-neuron contact. *J Neurosci*, 29, 11723-31. doi:  
450 10.1523/JNEUROSCI.2818-09.2009.
- 451 GOEBBELS, S., BORMUTH, I., BODE, U., HERMANSON, O., SCHWAB, M. H. & NAVE, K. A. 2006. Genetic  
452 targeting of principal neurons in neocortex and hippocampus of NEX-Cre mice. *Genesis*, 44,  
453 611-21. doi: 10.1002/dvg.20256.
- 454 GOUR, A., BOERGENS, K. M., HEIKE, N., HUA, Y., LASERSTEIN, P., SONG, K. & HELMSTAEDTER, M. 2021.  
455 Postnatal connectomic development of inhibition in mouse barrel cortex. *Science*, 371doi:  
456 10.1126/science.abb4534.
- 457 HE, S., LI, Z., GE, S., YU, Y. C. & SHI, S. H. 2015. Inside-Out Radial Migration Facilitates Lineage-  
458 Dependent Neocortical Microcircuit Assembly. *Neuron*, 86, 1159-66. doi:  
459 10.1016/j.neuron.2015.05.002.
- 460 HIRAYAMA, T., TARUSAWA, E., YOSHIMURA, Y., GALJART, N. & YAGI, T. 2012. CTCF is required for neural  
461 development and stochastic expression of clustered Pcdh genes in neurons. *Cell Rep*, 2, 345-



- 462 57. doi: 10.1016/j.celrep.2012.06.014.
- 463 HOLTMAAT, A. & SVOBODA, K. 2009. Experience-dependent structural synaptic plasticity in the  
464 mammalian brain. *Nat Rev Neurosci*, 10, 647-58. doi: 10.1038/nrn2699.
- 465 HONIG, B. & SHAPIRO, L. 2020. Adhesion Protein Structure, Molecular Affinities, and Principles of Cell-  
466 Cell Recognition. *Cell*, 181, 520-535. doi: 10.1016/j.cell.2020.04.010.
- 467 JANG, S., LEE, H. & KIM, E. 2017. Synaptic adhesion molecules and excitatory synaptic transmission.  
468 *Curr Opin Neurobiol*, 45, 45-50. doi: 10.1016/j.conb.2017.03.005.
- 469 KANEKO, R., KATO, H., KAWAMURA, Y., ESUMI, S., HIRAYAMA, T., HIRABAYASHI, T. & YAGI, T. 2006.  
470 Allelic gene regulation of Pcdh-alpha and Pcdh-gamma clusters involving both monoallelic  
471 and biallelic expression in single Purkinje cells. *J Biol Chem*, 281, 30551-60. doi:  
472 10.1074/jbc.M605677200.
- 473 KIEFER, L., CHIOSSO, A., LANGEN, J., BUCKLEY, A., GAUDIN, S., RAJKUMAR, S. M., SERVITO, G. I. F., CHA,  
474 E. S., VIJAY, A., YEUNG, A., HORTA, A., MUI, M. H. & CANZIO, D. 2023. WAPL functions as a  
475 rheostat of Protocadherin isoform diversity that controls neural wiring. *Science*, 380,  
476 eadf8440. doi: 10.1126/science.adf8440.
- 477 KOHMURA, N., SENZAKI, K., HAMADA, S., KAI, N., YASUDA, R., WATANABE, M., ISHII, H., YASUDA, M.,  
478 MISHINA, M. & YAGI, T. 1998. Diversity revealed by a novel family of cadherins expressed in  
479 neurons at a synaptic complex. *Neuron*, 20, 1137-51. doi: 10.1016/s0896-6273(00)80495-x.
- 480 KOSTADINOV, D. & SANES, J. R. 2015. Protocadherin-dependent dendritic self-avoidance regulates  
481 neural connectivity and circuit function. *Elife*, 4doi: 10.7554/eLife.08964.
- 482 LAMASSA, N., SVERDLOV, H., MAMBETALIEVA, A., SHAPIRO, S., BUCARO, M., FERNANDEZ-MONREAL,  
483 M. & PHILLIPS, G. R. 2021. Gamma-protocadherin localization at the synapse is associated  
484 with parameters of synaptic maturation. *J Comp Neurol*, 529, 2407-2417. doi:  
485 10.1002/cne.25102.
- 486 LEDDEROSE, J., DIETER, S. & SCHWARZ, M. K. 2013. Maturation of postnatally generated olfactory bulb  
487 granule cells depends on functional gamma-protocadherin expression. *Sci Rep*, 3, 1514. doi:  
488 10.1038/srep01514.
- 489 LEFEBVRE, J. L., KOSTADINOV, D., CHEN, W. V., MANIATIS, T. & SANES, J. R. 2012. Protocadherins  
490 mediate dendritic self-avoidance in the mammalian nervous system. *Nature*, 488, 517-21.  
491 doi: 10.1038/nature11305.
- 492 LEFEBVRE, J. L., ZHANG, Y., MEISTER, M., WANG, X. & SANES, J. R. 2008. gamma-Protocadherins  
493 regulate neuronal survival but are dispensable for circuit formation in retina. *Development*,  
494 135, 4141-51. doi: 10.1242/dev.027912.
- 495 LENDVAI, B., STERN, E. A., CHEN, B. & SVOBODA, K. 2000. Experience-dependent plasticity of dendritic  
496 spines in the developing rat barrel cortex in vivo. *Nature*, 404, 876-81. doi:  
497 10.1038/35009107.
- 498 LV, X., LI, S., LI, J., YU, X. Y., GE, X., LI, B., HU, S., LIN, Y., ZHANG, S., YANG, J., ZHANG, X., YAN, J., JOYNER,  
499 A. L., SHI, H., WU, Q. & SHI, S. H. 2022. Patterned cPCDH expression regulates the fine  
500 organization of the neocortex. *Nature*, 612, 503-511. doi: 10.1038/s41586-022-05495-2.
- 501 MELTZER, S., BOULANGER, K. C., CHIRILA, A. M., OSEI-ASANTE, E., DELISLE, M., ZHANG, Q., KALISH, B.  
502 T., TASNIM, A., HUEY, E. L., FULLER, L. C., FLAHERTY, E. K., MANIATIS, T., GARRETT, A. M.,  
503 WEINER, J. A. & GINTY, D. D. 2023. gamma-Protocadherins control synapse formation and  
504 peripheral branching of touch sensory neurons. *Neuron*, 111, 1776-1794 e10. doi:  
505 10.1016/j.neuron.2023.03.012.

- 506 MOLUMBY, M. J., ANDERSON, R. M., NEWBOLD, D. J., KOBLESKY, N. K., GARRETT, A. M., SCHREINER, D.,  
507 RADLEY, J. J. & WEINER, J. A. 2017. gamma-Protocadherins Interact with Neuroligin-1 and  
508 Negatively Regulate Dendritic Spine Morphogenesis. *Cell Rep*, 18, 2702-2714. doi:  
509 10.1016/j.celrep.2017.02.060.
- 510 MOLUMBY, M. J., KEELER, A. B. & WEINER, J. A. 2016. Homophilic Protocadherin Cell-Cell Interactions  
511 Promote Dendrite Complexity. *Cell Rep*, 15, 1037-1050. doi: 10.1016/j.celrep.2016.03.093.
- 512 MOUNTOUFARIS, G., CHEN, W. V., HIRABAYASHI, Y., O'KEEFFE, S., CHEVEE, M., NWAKEZE, C. L.,  
513 POLLEUX, F. & MANIATIS, T. 2017. Multicluster Pcdh diversity is required for mouse olfactory  
514 neural circuit assembly. *Science*, 356, 411-414. doi: 10.1126/science.aai8801.
- 515 PHILLIPS, G. R., TANAKA, H., FRANK, M., ELSTE, A., FIDLER, L., BENSON, D. L. & COLMAN, D. R. 2003.  
516 Gamma-protocadherins are targeted to subsets of synapses and intracellular organelles in  
517 neurons. *J Neurosci*, 23, 5096-104. doi: 10.1523/JNEUROSCI.23-12-05096.2003.
- 518 PRASAD, T., WANG, X., GRAY, P. A. & WEINER, J. A. 2008. A differential developmental pattern of spinal  
519 interneuron apoptosis during synaptogenesis: insights from genetic analyses of the  
520 protocadherin-gamma gene cluster. *Development*, 135, 4153-64. doi: 10.1242/dev.026807.
- 521 RAWSON, R. L., MARTIN, E. A. & WILLIAMS, M. E. 2017. Mechanisms of input and output synaptic  
522 specificity: finding partners, building synapses, and fine-tuning communication. *Curr Opin*  
523 *Neurobiol*, 45, 39-44. doi: 10.1016/j.conb.2017.03.006.
- 524 RUBINSTEIN, R., THU, C. A., GOODMAN, K. M., WOLCOTT, H. N., BAHNA, F., MANNEPALLI, S., AHLSEN,  
525 G., CHEVEE, M., HALIM, A., CLAUSEN, H., MANIATIS, T., SHAPIRO, L. & HONIG, B. 2015.  
526 Molecular logic of neuronal self-recognition through protocadherin domain interactions. *Cell*,  
527 163, 629-42. doi: 10.1016/j.cell.2015.09.026.
- 528 SERIZAWA, S., MIYAMICHI, K., TAKEUCHI, H., YAMAGISHI, Y., SUZUKI, M. & SAKANO, H. 2006. A  
529 neuronal identity code for the odorant receptor-specific and activity-dependent axon sorting.  
530 *Cell*, 127, 1057-69. doi: 10.1016/j.cell.2006.10.031.
- 531 STEFFEN, D. M., FERRI, S. L., MARCUCCI, C. G., BLOCKLINGER, K. L., MOLUMBY, M. J., ABEL, T. &  
532 WEINER, J. A. 2021. The gamma-Protocadherins Interact Physically and Functionally with  
533 Neuroligin-2 to Negatively Regulate Inhibitory Synapse Density and Are Required for Normal  
534 Social Interaction. *Mol Neurobiol*, 58, 2574-2589. doi: 10.1007/s12035-020-02263-z.
- 535 STEFFEN, D. M., HANES, C. M., MAH, K. M., VALINO RAMOS, P., BOSCH, P. J., HINZ, D. C., RADLEY, J. J.,  
536 BURGESS, R. W., GARRETT, A. M. & WEINER, J. A. 2023. A Unique Role for Protocadherin  
537 gammaC3 in Promoting Dendrite Arborization through an Axin1-Dependent Mechanism. *J*  
538 *Neurosci*, 43, 918-935. doi: 10.1523/JNEUROSCI.0729-22.2022.
- 539 SUO, L., LU, H., YING, G., CAPECCHI, M. R. & WU, Q. 2012. Protocadherin clusters and cell adhesion  
540 kinase regulate dendrite complexity through Rho GTPase. *J Mol Cell Biol*, 4, 362-76. doi:  
541 10.1093/jmcb/mjs034.
- 542 SYTNYK, V., LESHCHYNS'KA, I. & SCHACHNER, M. 2017. Neural Cell Adhesion Molecules of the  
543 Immunoglobulin Superfamily Regulate Synapse Formation, Maintenance, and Function.  
544 *Trends Neurosci*, 40, 295-308. doi: 10.1016/j.tins.2017.03.003.
- 545 TAN, L., ZHANG, K. X., PECOT, M. Y., NAGARKAR-JAISWAL, S., LEE, P. T., TAKEMURA, S. Y., MCEWEN, J.  
546 M., NERN, A., XU, S., TADROS, W., CHEN, Z., ZINN, K., BELLEN, H. J., MOREY, M. & ZIPURSKY, S.  
547 L. 2015. Ig Superfamily Ligand and Receptor Pairs Expressed in Synaptic Partners in  
548 *Drosophila*. *Cell*, 163, 1756-69. doi: 10.1016/j.cell.2015.11.021.
- 549 TARUSAWA, E., SANBO, M., OKAYAMA, A., MIYASHITA, T., KITSUKAWA, T., HIRAYAMA, T., HIRABAYASHI,

550 T., HASEGAWA, S., KANEKO, R., TOYODA, S., KOBAYASHI, T., KATO-ITOH, M., NAKAUCHI, H.,  
551 HIRABAYASHI, M., YAGI, T. & YOSHIMURA, Y. 2016. Establishment of high reciprocal  
552 connectivity between clonal cortical neurons is regulated by the Dnmt3b DNA  
553 methyltransferase and clustered protocadherins. *BMC Biol*, 14, 103. doi: 10.1186/s12915-  
554 016-0326-6.

555 TOYODA, S., KAWAGUCHI, M., KOBAYASHI, T., TARUSAWA, E., TOYAMA, T., OKANO, M., ODA, M.,  
556 NAKAUCHI, H., YOSHIMURA, Y., SANBO, M., HIRABAYASHI, M., HIRAYAMA, T., HIRABAYASHI, T.  
557 & YAGI, T. 2014. Developmental epigenetic modification regulates stochastic expression of  
558 clustered protocadherin genes, generating single neuron diversity. *Neuron*, 82, 94-108. doi:  
559 10.1016/j.neuron.2014.02.005.

560 WADA, T., WALLERICH, S. & BECSKEI, A. 2018. Stochastic Gene Choice during Cellular Differentiation.  
561 *Cell Rep*, 24, 3503-3512. doi: 10.1016/j.celrep.2018.08.074.

562 WANG, X., WEINER, J. A., LEVI, S., CRAIG, A. M., BRADLEY, A. & SANES, J. R. 2002. Gamma  
563 protocadherins are required for survival of spinal interneurons. *Neuron*, 36, 843-54. doi:  
564 10.1016/s0896-6273(02)01090-5.

565 WEINER, J. A., WANG, X., TAPIA, J. C. & SANES, J. R. 2005. Gamma protocadherins are required for  
566 synaptic development in the spinal cord. *Proc Natl Acad Sci U S A*, 102, 8-14. doi:  
567 10.1073/pnas.0407931101.

568 WU, Q. & MANIATIS, T. 1999. A striking organization of a large family of human neural cadherin-like  
569 cell adhesion genes. *Cell*, 97, 779-90. doi: 10.1016/s0092-8674(00)80789-8.

570 YAGI, T. 2012. Molecular codes for neuronal individuality and cell assembly in the brain. *Front Mol*  
571 *Neurosci*, 5, 45. doi: 10.3389/fnmol.2012.00045.

572 YOGEV, S. & SHEN, K. 2014. Cellular and molecular mechanisms of synaptic specificity. *Annu Rev Cell*  
573 *Dev Biol*, 30, 417-37. doi: 10.1146/annurev-cellbio-100913-012953.

574

575

576

577

578

579

580

581 **Figures:**

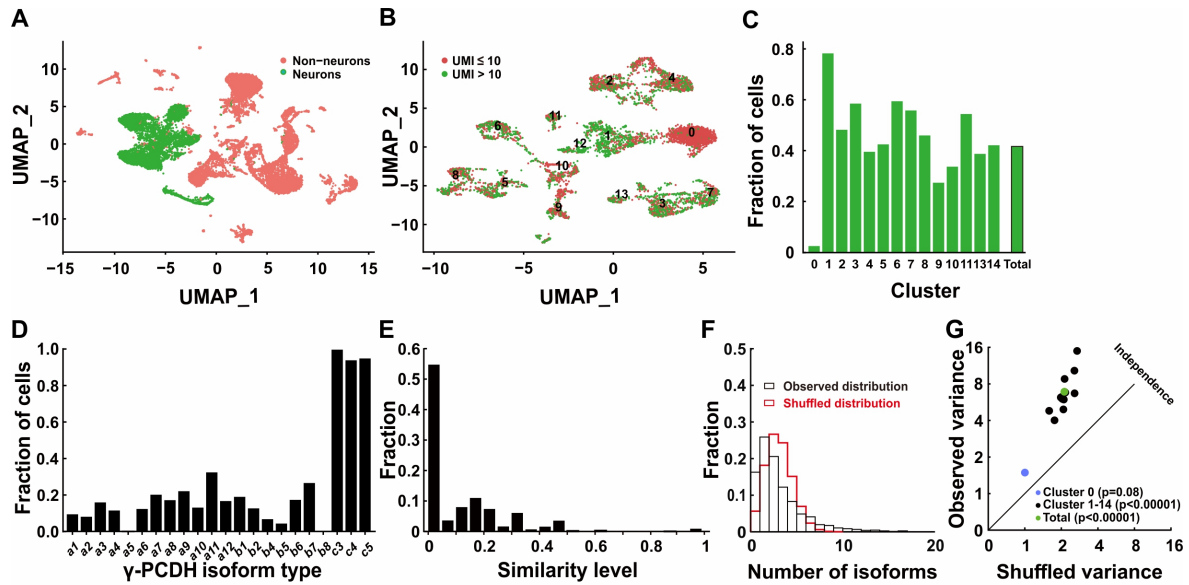

Zhu, et al. Figure 1

582 **Figure 1: Diversified expression of *Pcdhg* isoforms in neocortical neurons.**

583 (A) UMAP analysis displaying 17,438 cells obtained through 5'-end single-cell sequencing after  
 584 data cleanup and doublet removal. Neurons are depicted as green dots, while non-neuronal cells are  
 585 marked in red. (B) UMAP clusters of all neurons categorized by the UMI cutoff. Red dots denote  
 586 cells with fewer than 10 total UMIs of *Pcdhg* (n=3,671), and green dots denote cells with more than  
 587 10 UMIs (n=2,834). (C) Fractions of neurons with more than 10 UMIs in different clusters. (D)  
 588 Distribution of neurons expressing different *Pcdhg* isoforms in the neocortex. (E) Fraction  
 589 distribution illustrating similarity levels in the combinatorial expression of *Pcdhg* variable isoforms  
 590 among neurons. Similarity levels were calculated as  $\frac{A \cap B}{A \cup B}$ . (F) Observed distribution (black) of the  
 591 fraction of cells expressing varying numbers of isoforms across all neurons. The red curve represents  
 592 the shuffled distribution generated under the hypothesis of stochastic isoform expression. (G) The  
 593 variance difference between the observed and shuffled fraction distribution of cells from all clusters.

594

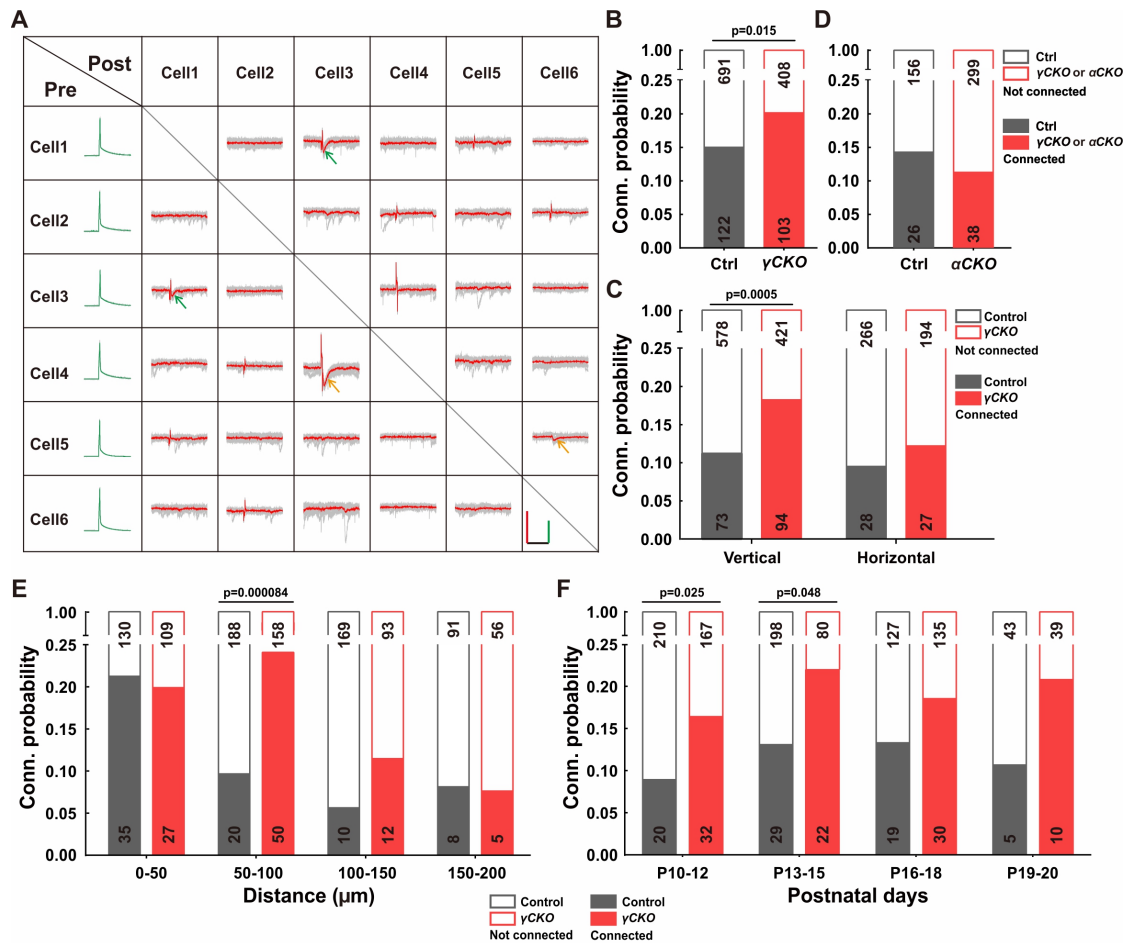

Zhu et al., Figure 2

595 **Figure 2: Increased Synaptic Connectivity in the Absence of  $\gamma$ -PCDH**

596 (A) Representative traces (red/green) from multiple electrode whole-cell patch-clamp recordings

597 conducted on six neurons in layer 2/3 of the barrel cortex. Average traces are shown in red and green,

598 with ten original traces in gray. Positive evoked postsynaptic responses are indicated by arrows.

599 Orange and green arrows denote unidirectional and bidirectional synaptic connections, respectively.

600 Scale bars: 100 mV (green), 50 pA (red), and 50 ms (black). (B, D) Connectivity probability among

601 nearby pyramidal cells in the layer 2/3 of the barrel cortex in *Pcdhg* cKO (B), *Pcdha* cKO mice (D)

602 and their littermate WT controls.  $\gamma$ CKO: *Pcdhg flox/flox::nex-cre* mice;  $\alpha$ CKO: *Pcdha*

603 *flox/flox::nex-cre* mice; Ctrl: *Pcdhg+/+::nex-cre* or *Pcdha+/+::nex-cre* mice. (C) Connectivity

604 probability among vertically or horizontally aligned neurons in the layer 2/3 of the barrel cortex in

605 *Pcdhg* cKO mice and their littermate WT controls. (E) Connectivity probability among vertically

606 aligned pyramidal cells as a function of the distance between recorded pairs in *Pcdhg* cKO mice

607 and WT mice. (F) Developmental profiling of connectivity probability among vertically aligned  
 608 neurons in *Pcdhg* cKO mice and WT mice. Chi-square tests were used in B-F to calculate statistical  
 609 differences.  
 610

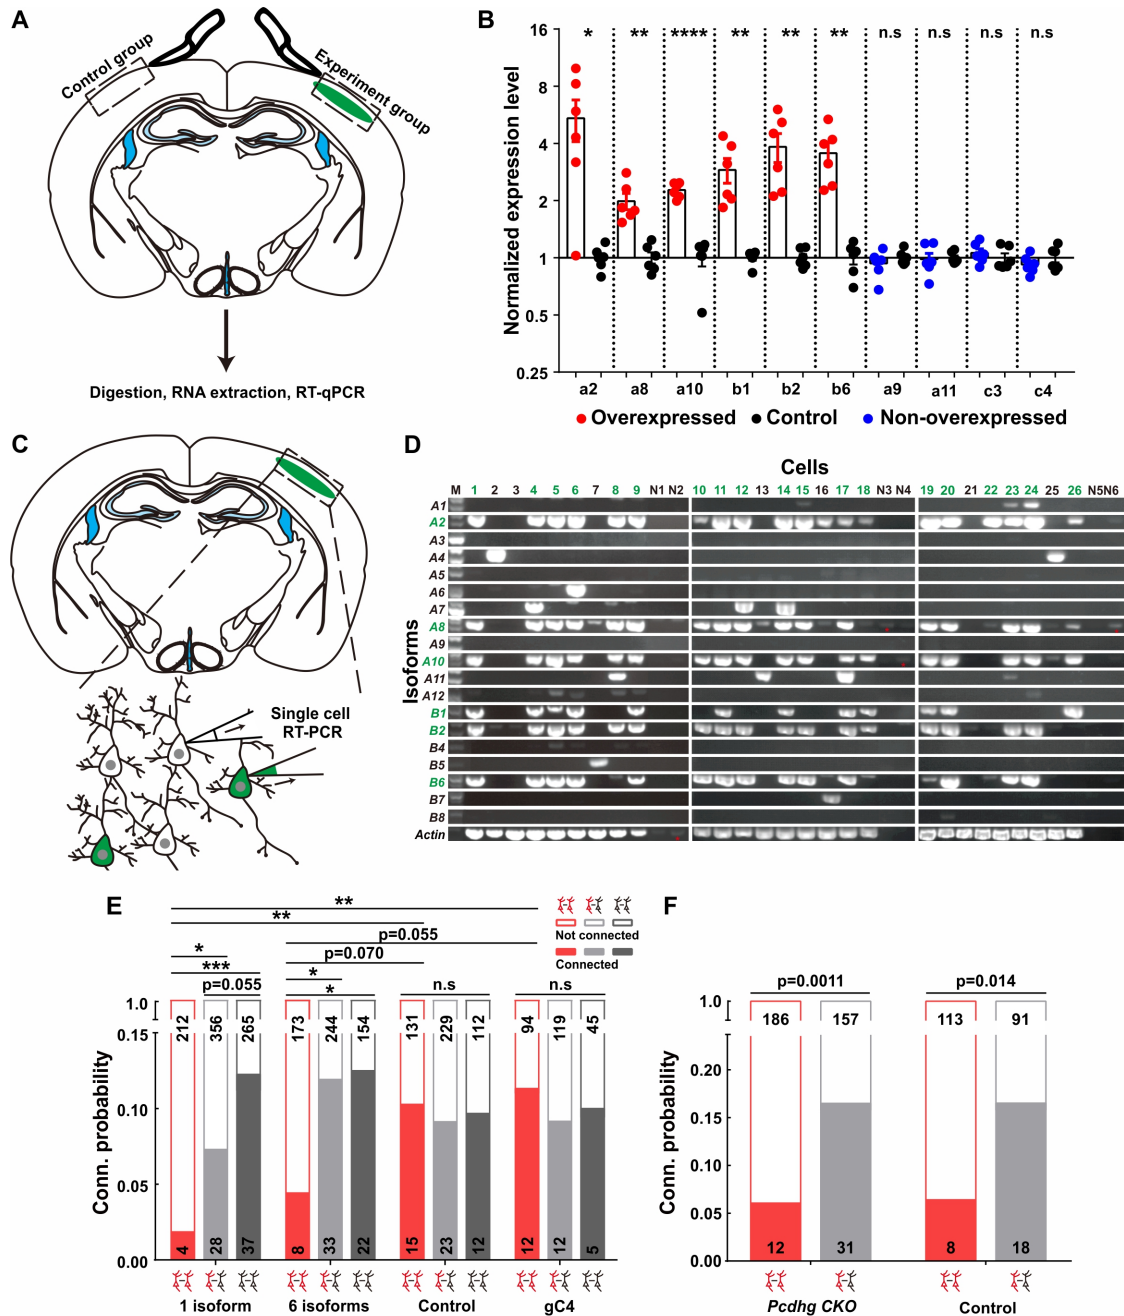

Zhu et al., Figure 3

611 Figure 3: Overexpressing identical variables, but not C4,  $\gamma$ -PCDHs in neurons decreased their  
 612 synaptic connectivity.



613 (A) Schematic illustrating the brain regions selected for qRT-PCR in both experimental and control  
614 groups. (B) qRT-PCR results showing overexpression levels in electroporated regions.  
615 Electroporated isoforms are indicated in red, control isoforms in blue, and contralateral sides used  
616 as controls are in black. Statistical analysis was conducted using Student's t-test, where \* indicates  
617  $p < 0.05$ , \*\*  $p < 0.01$ , \*\*\*  $p < 0.001$ , and \*\*\*\*  $p < 0.0001$ . (C) Diagram illustrating the process of cell  
618 extraction for single-cell RT-PCR assays. (D) Results of single-cell RT-PCR for  $\gamma$ -PCDH isoforms  
619 after electroporation. Neurons with fluorescence are highlighted in green, while nearby neurons  
620 without fluorescence are in black. Negative controls are labeled as N1-N6. Electroporated isoforms  
621 are shown in green, with red stars indicating faint signals in negative controls. (E) Impact of  
622 overexpressing one or six  $\gamma$ -PCDH isoforms on synaptic connectivity in WT mice. "1 isoform"  
623 represents *Pcdhga2*, and "6 isoforms" denote *Pcdhga2*, *Pcdhga8*, *Pcdhga10*, *Pcdhgb1*, *Pcdhgb2*,  
624 and *Pcdhgb6*. "gC4" stands for *Pcdhgc4*, and "Control" indicates plasmid vector without *Pcdhg*  
625 insertion. (F) The influence of overexpressing 6  $\gamma$ -PCDH isoforms on synaptic connectivity in  
626 *Pcdhg* cKO mice. The same 6 isoforms used as in (E) were employed. *Pcdhg* cKO: *Pcdhg*  
627 conditional knockout mice; Control: WT littermates. Statistical differences between groups in (E)  
628 and (F) were determined using the chi-square test and false discovery rate (FDR, Benjamini-  
629 Hochberg method) correction.



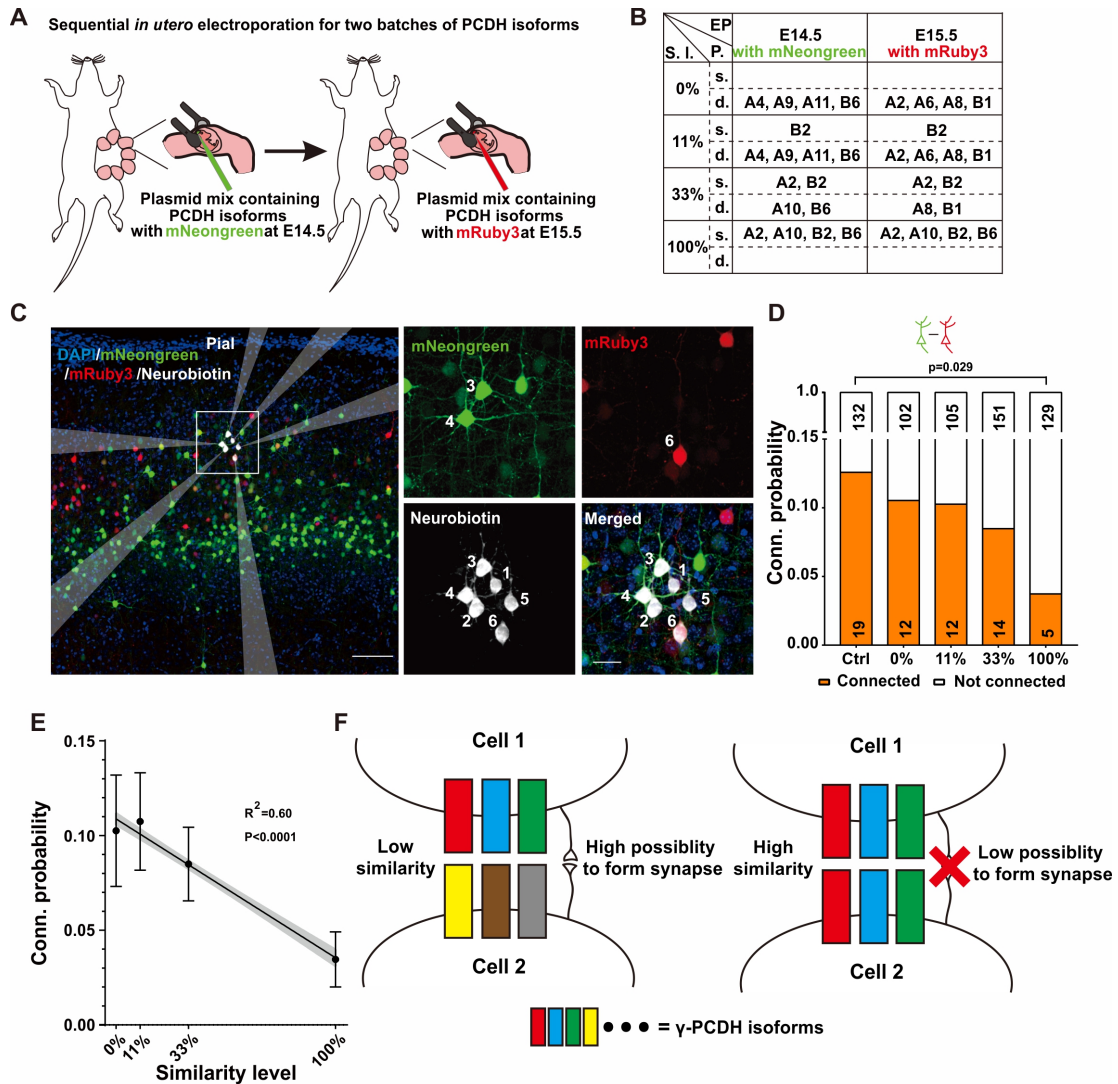

Zhu *et al.*, Figure 4

630 **Figure 4: Diversified  $\gamma$ -PCDHs are critical for synapse formation in cortical neurons.**

631 (A) Diagram illustrating the sequential *in utero* electroporation process at E14.5 and E15.5. (B)

632 Overview of the overexpressed  $\gamma$ -PCDH isoforms in different experiments, resulting in varying

633 similarity levels between neurons. S.I.: Similarity level; EP: Electroporation; P.: plasmids mixture;

634 s./d., Same or different isoforms in two electroporations. (C) Sample image of recorded neurons

635 after two rounds of electroporation at E14.5 (mNeogreen) and E15.5 (mRuby3). Neurons labeled

636 as positive for mNeogreen (cells 3 and 4), mRuby3 (cell 6), and negative without fluorescence

637 (cells 1, 2, and 5). Neurobiotin was used in the internal solution to label recorded neurons. The

638 translucent arrows show the positions of the electrodes. Scale bar, left: 100  $\mu$ m, right: 25  $\mu$ m. (D)

639 Connectivity probability for neuron pairs overexpressing different sets of  $\gamma$ -PCDH isoforms (labeled

640 with different fluorescence) following sequential *in utero* electroporation. Statistical differences

641 were determined using the Chi-square test with FDR (Benjamini-Hochberg method) correction. **(E)**  
642 Correlation between the similarity level of overexpressed  $\gamma$ -PCDH combinations and the probability  
643 of synaptic connections. Each data point corresponds to the outcome of 100 bootstrapped samples  
644 derived from the source data presented in panel **D**. Error bars indicate the standard deviation (S.D)  
645 for each data point. The gray shaded area represents the 95% confidence interval of the curve fitting.  
646 **(F)** Graph summarizing the effect of  $\gamma$ -PCDHs on synapse formation.
